# Supplementary material for: Penile HPV prevalence and associated factors among 20–70-year-old men from Gampaha district in Sri Lanka: A community-based study in a lower- and middle-income country
Source: Research Square preprint supplement (doi:10.21203/rs.3.rs-6116286/v1), 2025-05-20
Supplement: Supplementary file 1 [file 16b5a0279e733501bd53bd34.docx]

**Supplementary Tables**

Table 1 Comparison of socio-demographic characteristics of respondents and non-respondents

| **Characteristic** | **Respondent** | | **Non respondent** | |
| --- | --- | --- | --- | --- |
| **No (n=579)** | **%** | **No (n=61)** | **%** |
| **Age (years)** |  |  |  |  |
| 20-29 | 175 | 30.2 | 17 | 27.9 |
| 30-39 | 148 | 25.6 | 12 | 19.7 |
| 40-49 | 120 | 20.7 | 8 | 13.1 |
| 50-59 | 81 | 14 | 15 | 24.6 |
| 60-70 | 55 | 9.5 | 9 | 14.8 |
| **Ethnicity** |  |  |  |  |
| Sinhalese | 559 | 96.5 | 59 | 96.7 |
| Tamil | 12 | 2.1 | 2 | 3.3 |
| Muslim | 6 | 1 | 0 | 0 |
| Other | 2 | 0.3 | 0 | 0 |
| **Employment status** |  |  |  |  |
| Employed | 556 | 96 | 58 | 95.1 |
| Not employed | 23 | 4 | 3 | 4.9 |
| **Total** | **579** | **100** | **61** | **100** |

Table 2 Frequency distribution of socio-economic characteristics of the respondents

| Characteristics | | No(n=579) | % |
| --- | --- | --- | --- |
| **Income** | | | |
|  | <10,000 | 16 | 2.8 |
| 10,001-20,000 | 24 | 4.1 |
| 20,001-30,000 | 66 | 11.4 |
| 30,001-40,000 | 75 | 13.0 |
| 40,001-50,000 | 105 | 18.1 |
| >50,001 | 293 | 50.6 |
| **Employment status & category** | | | |
|  | Not employed | 23 | 4.0 |
| Major group 1-Legislaters, Senior officials, Managers | 33 | 5.7 |
| Major group 2-Proffesionals | 20 | 3.5 |
| Major group 3-Technitians, associate professionals | 74 | 12.8 |
| Major group 4-Clarcks | 21 | 3.6 |
| Major group 5-Service workers, market sales workers | 14 | 2.4 |
| Major group 6-Skilled agricultural and fishery workers | 30 | 5.2 |
| Major group 7- Craft and related trade workers | 101 | 17.4 |
| Major group 8-Plant and machine operators | 118 | 20.4 |
| Major group 9-Elementary occupation | 132 | 22.8 |
| Major group 0-Armed forces | 13 | 2.2 |
| **Current occupation duration in years** | | | |
|  | 0-5 | 165 | 28.5 |
| 6-10 | 121 | 20.9 |
| 11-15 | 113 | 19.5 |
| >15 | 180 | 31.1 |
| **Total** | **579** | **100** |

Table 3 Frequency distribution of contributory factors of the HPV infection among respondents

| Characteristic | | No(n=579) | % |
| --- | --- | --- | --- |
| **HPV Vaccination** | | | |
| Yes | | 579 | 100 |
| No | | 0 | 0 |
| **History of genital warts** | | | |
|  | Yes | 18 | 3.1 |
|  | No | 561 | 96.9 |
| **History of phimosis** | | | |
|  | Yes | 30 | 5.2 |
|  | No | 549 | 94.8 |
| **History of circumcision surgery** | | | |
|  | Yes | 24 | 4.1 |
|  | No | 555 | 95.9 |
| **History of anogenital injury** | | | |
|  | Yes | 33 | 5.7 |
|  | No | 546 | 94.3 |
| **Diagnosed having HIV** | | | |
|  | Yes | 0 | 0 |
|  | No | 579 | 100 |
| **History of any other immunodeficient condition apart from HIV**  (Chronic liver disease, chronic renal disease, Diabetes mellites) | | | |
|  | Yes | 13 | 2.2 |
|  | No | 566 | 97.8 |
| **Total** | **579** | **100%** |

Table 4 Frequency distribution of selected behavioral risk factors of the HPV infection among respondents

| Characteristic | | No(n=579) | % |
| --- | --- | --- | --- |
| **Consumption of tobacco** | | | |
|  | Never | 256 | 44.2 |
| Occasionally | 53 | 9.2 |
| Frequently | 270 | 46.6 |
| **Consumption of alcohol** | | | |
|  | Never | 116 | 20.0 |
| Occasionally | 81 | 14.0 |
| Frequently | 382 | 66.0 |
| **Consumption of illegal drugs** | | | |
|  | Never | 535 | 92.4 |
| Occasionally | 8 | 1.4 |
| Frequently | 36 | 6.2 |
| **Total** | **579** | **100** |
