# Supplementary material for: Penile HPV prevalence and associated factors among 20–70-year-old men from Gampaha district in Sri Lanka: A community-based study in a lower- and middle-income country
Source: Research Square preprint supplement (doi:10.21203/rs.3.rs-6116286/v1), 2025-05-20
Supplement: Supplementary file 2 [file d20091ef1c5c1570db44c8a6.docx]

**Highly Confidential**

**Name of the interviewer: ……………………………………………………**

Serial No: ………………… Date: ………………

A research project on “Human papillomavirus-driven male carcinogenic disease burden among men of 20-70 years in Gampaha District (known healthy men) and cost effectiveness of different preventive strategies’’

All the sections need to be answered by consented, eligible men (to be filled by the interviewer).

We are conducting the study among known healthy men aged 20-70 years in the Gampaha District

Your name and identity will not be revealed to anybody under any circumstances.

All data will be kept highly confidential.

**Part A –Demographic and Socio-economic Information**

| 1. Date of birth | Date | Month | Year |
| --- | --- | --- | --- |
|  |  |  |

**Please mark the correct cage with the mark “X”**

1. What is your religion?

| a. Buddhism |  |
| --- | --- |
| b. Hinduism |  |
| c. Roman Catholic |  |
| d. Christian |  |
| e. Islam |  |

Other ………………………………………….

1. What is your ethnicity?

| a. Sinhalese |  |
| --- | --- |
| b. Tamil |  |
| c. Moor |  |
| d. Burgher |  |

Other ……………………………

1. What is your highest level of education attained?

| 1. No schooling |  |
| --- | --- |
| 1. Grade 1 to 5 |  |
| 1. Grade6to 8 |  |
| 1. Grade 9 to O/L Completed |  |
| 1. Completed A/L |  |
| 1. Technical Education |  |
| 1. Higher Education (Diploma/Degree) |  |

1. Are you employed?

| 1. Yes |  |
| --- | --- |
| 1. No |  |

5.1 If yes specify the type of occupation/ occupation

| occupation/ occupations | Duration in years |
| --- | --- |
| 1 |  |
| 2 |  |
| 3 |  |
| 4 |  |
| 5 |  |

1. What is your total family income?

| 1. <10000.00 |  |
| --- | --- |
| 1. 10001-20000 |  |
| 1. 21001-30000 |  |
| 1. 30001-40000 |  |
| 1. 40001-50000 |  |
| 1. >50001 |  |

1. **What is your marital state?**

| 1. Never married (legally /customary) |  |
| --- | --- |
| 1. Married (legally /customary)-living with a spouse |  |
| 1. Separated/divorced |  |
| 1. Spouse died-widowed |  |
| 1. Other |  |

Specify…**……………….**

**Part B-** **Past Medical, surgical** **history, and other risk behaviors history**

**Please mark the correct cage with an “X” mark**

| 1. Have you been fully vaccinated (completed all the doses) with the HPV prophylactic vaccine | Yes | No |
| --- | --- | --- |
| 1. Only answer is response is **yes to questions 8**, have you been completed all the doses before the commencement of the sexual activity | Yes | No |
| 1. Have you ever had Genital warts | Yes | No |
| 1. Have you ever had phimosis | Yes | No |
| 1. Have you undergone circumcision | Yes | No |
| 1. Have you had an anogenital Injury | Yes | No |
| 1. Have you been diagnosed with HIV | Yes | No |
| 1. Have you been diagnosed with a primary immune-deficient condition? | Yes | No |
| 1. Have you had Any other Sexually transmitted infection-related symptom | Yes | No |
| 1. **Only answer17 and 17.1** if response is **yes to questions 16,** Specify the symptom (eg. Discharge, Ulcer, pigmentation) |  | |
| 17.1 State the diagnosis (If known by the study participant) |  | |

**Please mark the correct cage with mark X**

1. Have you ever tried the following substance during your lifetime?

| 1. Tobacco | Never | Used during last year but not in last month | Used during last year and last month |
| --- | --- | --- | --- |
| 1. Alcohol | Never | Used during last year but not in last month | Used during last year and last month |
| 1. Illicit Drugs | Never | Used during last year but not in last month | Used during last year and last month |
| 1. Other Specify ………………... | Never | Used during last year but not in last month | Used during last year and last month |

**Part C - Sexual behaviors**

**Please write the answer or mark the correct cage with** **mark “X” at the appropriate cage**

1. Age at sexual debut (age at first penetrative (oral, anal, vaginal sex)), years? ……………………

**Consider both consented or unconsented sexual activities,** **please mark “X” at the appropriate cage**

1. Lifetime total number of male or female sexual partners?

|  | Male | | | | | Female | | | | |
| --- | --- | --- | --- | --- | --- | --- | --- | --- | --- | --- |
| Lifetime | 0-1 | 2-5 | 5-6 | 10-50 | >50 | 0-1 | 2-5 | 6-10 | 10-50 | >50 |
| Last one year | 0-1 | 2-5 | 5-6 | 10-50 | >50 | 0-1 | 2-5 | 6-10 | 10-50 | >50 |

1. Sexual orientation with women and/or men?

| 1. Heterosexual (Men practice penetrative sex with women) |  |
| --- | --- |
| 1. Homosexual (Men practice penetrative sex with men) |  |
| 1. Bisexual (Men practice penetrative sex with women or men) |  |

Other ……………………………………

1. Have you ever had penetrative sexual exposures with commercial sex workers male or female?

| 1. Yes |  |
| --- | --- |
| 1. No |  |

1. Have you ever had penetrative sexual activity with foreigners?

| 1. Yes |  |
| --- | --- |
| 1. No |  |

1. If yes, how many foreign partners? ……………………

If you know please specify the country/ countries ……………………………………………………

1. People have different sexual practices.

Have you ever heard about oral sex?

| 1. Yes |  |
| --- | --- |
| 1. No |  |

1. Have you ever practiced insertive oral sex?

| 1. Yes |  |
| --- | --- |
| 1. No |  |

1. People have different sexual practices.

Have you ever heard about anal sex?

| 1. Yes |  |
| --- | --- |
| 1. No |  |

1. Have you ever practiced anal sex?

| 1. Yes |  |
| --- | --- |
| 1. No |  |

1. Specify the types of sexual activities during the last one-year period? (Multiple answers possible)

| 1. Peno-Vaginal (Insertive vaginal) |  |
| --- | --- |
| 1. Peno-Oral (Insertive oral) |  |
| 1. Receptive-anal 2. Insertive -anal |  |
|  |
| 1. Other (Specify)…………………… |  |

1. Condom use during penetrative sexual exposures (Vaginal, anal, or oral) (Multiple answers possible)

| 1. Never |  |
| --- | --- |
| 1. Yes-Occasionally |  |
| 1. Yes-Every time |  |
| 1. During penetrative sexual exposure with foreigners |  |
| 1. During penetrative sexual exposures with commercial sex workers |  |

**Part D-** **Information about the regular (marital or cohabiting) sexual partner**

| 1. His or her occupation?............................. | | | |  | |
| --- | --- | --- | --- | --- | --- |
| 1. His or her age?......................................... |  |  |  | |
| 1. Was he or she ever had another sexual partner before | Yes | No | Not known | |
| 1. Did your partner have genital warts | Yes | No | Not known | |
| 1. Did your partner have Anogenital pre-cancer lesions, | Yes | No | Not known | |
| - 1. ( Please answer only answer if yes to question 35 )If Yes Tested for HPV | Yes | No | Not known | |
| 1. Did your partner had Anogenital cancer | Yes | No | Not known | |
| - 1. (Please answer only answer is yes to question 36) If yes Tested for HPV | Yes | No | Not known | |
| 1. Has your partner vaccinated with HPV prophylactic vaccine | Yes | No | Not known | |
